## Subscription and Business Information

*The American Journal of Psychiatry*, ISSN 0002-953X, is published monthly by the American Psychiatric Association.

The American Psychiatric Association does not hold itself responsible for statements made in its publications by contributors or advertisers. Unless so stated, material in *The American Journal of Psychiatry* does not reflect the endorsement, official attitude, or position of the American Psychiatric Association or of the Journal's Editorial Board.

Periodicals postage paid at Arlington, VA, and additional mailing offices. POSTMASTER: Send address changes to *The American Journal of Psychiatry*, Circulation Department, American Psychiatric Association, 1000 Wilson Blvd., Suite 1825, Arlington, VA 22209-3901.

### Editorial Office

*American Journal of Psychiatry*  
American Psychiatric Association  
1000 Wilson Blvd., Suite 1825  
Arlington, VA 22209-3901  
Phone: (703) 907-7885, (703) 907-7889  
E-mail: [ajp@psych.org](mailto:ajp@psych.org)

### Customer Service

Phone: (800) 368-5777 (toll-free)  
E-mail: [appi@psych.org](mailto:appi@psych.org)

### APA Member Subscription Services

Phone: (888) 35-PSYCH (toll-free)

### Subscriptions

Per year: individual \$294.00,  
international \$442.00

Institutional subscriptions are tier priced. For institutional site license or pricing information, contact (703) 907-8538 or [institutions@psych.org](mailto:institutions@psych.org).

*Additional subscription options, including single issues and student rates*

Contact Customer Service

### Advertising

*Pharmaceutical Print and Online Advertising*  
Frank Cox, Kathleen Harrison, Tim Wolfinger  
Pharmaceutical Media, Inc.  
30 East 33rd Street  
New York, NY 10016  
Phone: (212) 904-0379  
E-mail: [twolfinger@pminy.com](mailto:twolfinger@pminy.com)

*Nonpharmaceutical and Online Sales*

Eamon Wood  
Pharmaceutical Media, Inc.  
E-mail: [ewood@pminy.com](mailto:ewood@pminy.com)  
(see address and phone above).

### Permissions and Reprints

Material published in the journals of the American Psychiatric Association and American Psychiatric Association Publishing is protected by copyright and all rights are reserved. Material may not be reproduced in any form or by any means without written permission from the copyright owner. For permission to reproduce material published by APA, please visit [http://www.appi.org/Customer\\_Service/Pages/Permissions.aspx](http://www.appi.org/Customer_Service/Pages/Permissions.aspx) for more information. Permission can also be secured through the Copyright Clearance Center ([www.copyright.com](http://www.copyright.com)).

APA does not require that permission be obtained for the photocopying of isolated articles for nonprofit classroom or library reserve use; all fees associated with such permission are waived. This consent does not extend to other kinds of copying, such as copying for general distribution, for advertising or promotional purposes, for creating new collective works, or for resale. Requests for commercial distribution should be directed to (703) 907-7875.

For bulk reprints, please contact Jane Cha, (703) 907-7889; email: [jcha@psych.org](mailto:jcha@psych.org).

Indexed in Abstracts for Social Workers, Academic Abstracts, Biological Abstracts, Chemical Abstracts, Chicago Psychoanalytic Literature Index, Cumulative Index to Nursing Literature, Excerpta Medica, Hospital Literature Index, Index Medicus, International Nursing Index, Nutrition Abstracts, Psychological Abstracts, Science Citation Index, Social Science Source, and Social Sciences Index.

Pages are produced by Dartmouth Journal Services, Waterbury, VT, and printed by Dartmouth Printing Company, Hanover, NH, on acid-free paper effective with Volume 169, Number 1, January 2012.

© 2016 American Psychiatric Association.

# We've got you covered.

For over 30 years, we have provided psychiatrists with exceptional protection and personalized service. We offer comprehensive insurance coverage and superior risk management support through an "A" rated carrier.

## ANNOUNCING NEW ENHANCEMENTS TO THE AMERICAN PSYCHIATRIC ASSOCIATION PSYCHIATRISTS' PROFESSIONAL LIABILITY PROGRAM:

- **Defense Expenses related to Licensing Board Hearings and Other Proceedings:** Increased Limit to \$50,000 per proceeding with NO annual aggregate (higher limits are available up to \$150,000)
- **Fire Legal Liability Coverage:** Limit of liability increased to \$150,000 for fire damage to third party property
- **Emergency Aid Coverage:** Reimbursement up to \$15,000 in costs and expenses for medical supplies
- Insured's **Consent to Settle** is now required in the settlement of any claim – No arbitration clause!
- **First Party Assault and Battery Coverage:** Up to \$25,000 reimbursement for medical expenses related to injuries and/or personal property damage caused by a patient or client
- **Medical Payments Coverage:** Increased limit to \$100,000 for Medical Payments to a patient or client arising from bodily injury on your business premises

## IN ADDITION WE CONTINUE TO OFFER THE FOLLOWING MULTIPLE PREMIUM DISCOUNTS:

- **50% Resident-Fellow Member Discount**
- **Up to 50% New Doctor Discount** (for those who qualify)
- **50% Part Time Discount** for up to 20 client hours a week or less
- **10% New Policyholder Discount** (must be claims free for the last 6 months)
- **15% Child and Adolescent Psychiatrist Discount** for those whose patient base is more than 50% Children and Adolescents
- **10% Claims Free Discount** for those practicing 10 years, after completion of training, and remain claims free
- **5% Risk Management Discount** for 3 hours of CME

*(Above Coverage Features and Discounts are subject to individual state approval)*

Visit us at [apamalpractice.com](http://apamalpractice.com) or call **877.740.1777** to learn more.

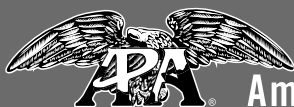

**American Professional Agency**

LEADERS IN PSYCHIATRIC MEDICAL LIABILITY INSURANCE

ENDORSED BY THE  
AMERICAN PSYCHIATRIC  
ASSOCIATION
