## PERSPECTIVAS

### EDITORIALES

- 755 El Juego Triple (Triple Play): Niños pubescentes, marihuana y paranoia**  
*Christian Thurstone, M.D.*
- 757 El extraño caso del tabaco y la esquizofrenia—Los detectives epidemiólogos están sobre la pista**  
*Thomas Munk Laursen, Ph.D., John J. McGrath, M.D.*
- 759 Sesgo manifiesto y oculto en estudios observacionales grandes**  
*Yu Cheng, Ph.D.*
- 761 Más investigación de la ketamina**  
*Robert Freedman, M.D.*

### CONFERENCIA DE CASO CLÍNICO

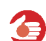

- 763 Depresión tardía: Un rol para la tecnología de los acelerómetros en el diagnóstico y el manejo**  
*Ipsit V. Vahia, M.D., Daniel D. Sewell, M.D.* EMC • AUDIO • GUÍAS CLÍNICAS

### PERSPECTIVAS EN SALUD MENTAL GLOBAL

- 769 Trastornos de personalidad en la región vasca de España: Aplicabilidad de los criterios alternativos del DSM-5 para los trastornos de personalidad**  
*Naiara Ozamiz Etxebarria, Ph.D., et al.* GUÍAS CLÍNICAS

### RESÚMENES Y RESEÑAS

- 771 La fenomenología de la depresión mayor y la representatividad y naturaleza de los criterios del DSM**  
*Kenneth S. Kendler, M.D.* GUÍAS CLÍNICAS

## NUEVAS INVESTIGACIONES

### ARTÍCULOS

- 781 Efectos cumulativos concurrentes y sostenidos del consumo de marihuana durante la adolescencia en los síntomas psicóticos subclínicos**  
*Jordan Bechtold, Ph.D., et al.* EDITORIAL • EMC • AUDIO • GUÍAS CLÍNICAS
- 790 Cannabis, psicosis y mortalidad: Un estudio de cohorte de 50.373 hombres suecos**  
*Edison Manrique-García, M.D., Ph.D., et al.* AUDIO • GUÍAS CLÍNICAS
- 799 Exposición prenatal a la nicotina y riesgo de esquizofrenia en niños de una cohorte nacional de nacimiento**  
*Solja Niemelä, M.D., Ph.D., et al.* EDITORIAL • EMC • AUDIO • GUÍAS CLÍNICAS
- 807 El efecto del tratamiento concomitante con ISRS y estatinas: Un estudio basado en la población**  
*Ole Köhler, M.D., et al.* EDITORIAL • AUDIO • VIDEO • GUÍAS CLÍNICAS
- 816 Un estudio de frecuencia de dosis, controlado con placebo, aleatorizado y doble ciego de la ketamina intravenosa en pacientes con depresión resistente al tratamiento**  
*Jaskaran B. Singh, M.D., et al.* EDITORIAL • VIDEO • GUÍAS CLÍNICAS
- 827 Un ensayo aleatorizado para evaluar la eficacia y seguridad de ABT-126, un agonista del receptor selectivo  $\alpha 7$  nicotínico de acetilcolina, en el tratamiento del déficit cognitivo en esquizofrenia**  
*George M. Haig, Pharm.D., M.B.A., et al.* AUDIO

**CARTAS AL EDITOR**

**836 Inclusión de los ensayos de dosis flexibles en el meta-análisis de dependencia de la dosis de ISRS**

*Fredrik Hieronymus, M.D., Elias Eriksson, Med.Dr.*

**836 Abordando las dificultades en el estudio de relaciones entre dosis y respuesta de ISRS en depresión: Respuesta a Hieronymus y Eriksson**

*Ewgeni Jakubovski, M.A., Michael H. Bloch, M.D., M.S.*

**838 Importancia de los biotipos de control para diferenciar biotipos de psicosis claros**

*Andres H. Neuhaus, M.D.*

**838 Desafíos de la identificación de subtipos de psicosis neurobiológicamente claros: Respuesta a Neuhaus**

*Brett A. Clementz, Ph.D. [on behalf of the B-SNIP principal investigators]*

**839 Trastorno de despersonalización/desrealización persistente inducido por cannabinoides sintéticos**

*Ghita Dadi, M.D., et al.*

**RESEÑAS BIBLIOGRÁFICAS**

**841 Boundaries and Boundary Violations in Psychoanalysis, Second Edition [Fronteras y violación de límites en el psicoanálisis, Segunda edición]**

*Leon Hoffman, M.D.*

**842 Long-Term Outcomes in Psychopathology Research: Rethinking the Scientific Agenda [Resultados a largo plazo en la investigación en psicopatología: Repensando la agenda científica]**

*Thomas J. Raedler, M.D.*

**843 Treating Nonepileptic Seizures: Therapist Guide; Taking Control of Your Seizures: Workbook [Tratamiento de convulsiones no epilépticas: Guía para los terapeutas; Tomando control de tus convulsiones: Manual]**

*Brian Rothberg, M.D.*

**ACTOS OFICIALES**

**845 Informe anual de 2015 del American Board of Psychiatry and Neurology, Inc.**

**OTROS TEMAS DE INTERÉS**

**853 Educación Médica Continuada**

**Cubierta:** [Kendler (p. 771) reviews descriptions of clinical depression written in 1900–1960 textbooks to see how DSM-5 criteria capture these descriptions. Photo by Aaron Levin.]

Article content that addresses **Core Competencies**, defined by the Accreditation Council of Graduate Medical Education and the American Board of Medical Specialties, is indicated by the following symbols:

-  Professionalism
-  Medical Knowledge
-  Interpersonal and Communication Skills
-  Patient Care and Procedural Skills
-  Practice-Based Learning and Improvement
-  Systems-Based Practice.

More information is available at [www.abms.org/maintenance\\_of\\_certification/MOC\\_competencies.aspx](http://www.abms.org/maintenance_of_certification/MOC_competencies.aspx)

**AUDIO** Highlighted in AJP Audio, a downloadable .mp3 file available at [ajp.psychiatryonline.org](http://ajp.psychiatryonline.org)

**CME** A course covering the content of this article is available online for paid subscribers to the AJP CME Course program

**EDITORIAL** Discussed in one of the issue's editorials

**GUÍAS CLÍNICAS** Clinical Guidance provided on the English table of contents

**VIDEO** Highlighted online by Deputy Editor Daniel S. Pine, M.D.

**La Tabla de Contenidos y resúmenes de Este Número Está Disponible en Español**

*(This issue's Table of Contents and abstracts are available in Spanish)*

Translation presented in collaboration with the Office of Global Health, Rutgers-Robert Wood Johnson Medical School

Support for this effort provided by ACTA Colombia.

**Translation courtesy of**

**Sergi Casals, M.A.**, Garuna, Medellín, Colombia ([www.garunaeditors.com](http://www.garunaeditors.com))

**Carlos Lopez Jaramillo, M.D.**, Universidad de Antioquia, Medellín, Colombia

**Javier I. Escobar, M.D., M.Sc.**, Rutgers-Robert Wood Johnson Medical School

# La fenomenología de la depresión mayor y la representatividad y naturaleza de los criterios del DSM

Kenneth S. Kendler, M.D.

¿Cómo deben relacionarse los criterios del DSM con los trastornos para los que han sido diseñados? Para abordar esta pregunta de forma empírica, el autor examina cómo los criterios sintomáticos del DSM-5 para depresión mayor captan las descripciones de la depresión clínica en la tradición psiquiátrica occidental post-Kraepelin tal como se describe en los manuales publicados entre 1900 y 1960. Se describieron 18 síntomas y signos de depresión, 10 de los cuales quedan cubiertos por los criterios del DSM para depresión mayor o melancolía. Para dos síntomas (estado de ánimo y contenido cognitivo), los criterios del DSM son considerablemente más estrictos que los descritos en los manuales. Cinco síntomas y signos (cambios en volición/motivación, lentitud del habla, ansiedad, otros síntomas físicos y despersonalización/desrealización) no están presentes en los criterios del DSM. En comparación con los criterios del DSM, estos autores hicieron más hincapié en los cambios cognitivos, físicos y psicomotrices y menos en los síntomas neurovegetativos. Estos resulta-

dos sugieren que hay rasgos importantes de la depresión mayor que los criterios del DSM no captan. Esto no posa ningún problema siempre que los criterios del DSM se entiendan como indicadores más que como factores constitutivos de los trastornos psiquiátricos. Sin embargo, desde el DSM-III, nuestro campo ha avanzado hacia una cosificación del DSM que implícitamente asume que los trastornos psiquiátricos realmente son los criterios del DSM. Es decir, hemos tomado un indicador de una cosa como la propia cosa. Por ejemplo, los buenos criterios diagnósticos deberían ser sucintos y requerir una inferencia mínima, pero algunos fenómenos clínicos críticos son sutiles, difíciles de evaluar y se experimentan de formas muy diversas. Este error conceptual ha contribuido al empobrecimiento de la psicopatología y ha afectado nuestra investigación, nuestro trabajo clínico y nuestra docencia de maneras indeseables.

*(Am J Psychiatry 2016; 173:771–780)*

# Efectos cumulativos concurrentes y sostenidos del consumo de marihuana durante la adolescencia en los síntomas psicóticos subclínicos

Jordan Bechtold, Ph.D., Alison Hipwell, Ph.D., David A. Lewis, M.D., Rolf Loeber, Ph.D., Dustin Pardini, Ph.D.

**Objetivo:** Los adolescentes que consumen marihuana habitualmente pueden tener un riesgo aumentado de desarrollar síntomas psicóticos clínicos y subclínicos. Sin embargo, esta asociación se podría explicar por medio de la causalidad inversa de otros factores. Para abordar estas limitaciones, el presente estudio examinó si los adolescentes que consumen marihuana habitualmente muestran un aumento sistemático de síntomas psicóticos subclínicos que persiste durante periodos de abstinencia sostenida.

**Método:** La muestra incluía 1.009 niños que de primero y de séptimo grado. Desde los 13 a los 18 años, se registró anualmente el auto-reporte de la frecuencia de consumo de marihuana, los síntomas psicóticos subclínicos y diversas variables de confusión que podían variar por épocas (por ejemplo, consumo de otras sustancias, internalizar/externalizar problemas). Los modelos de efectos fijos (cambio intra-sujeto) examinaron si los adolescentes mostraron un aumento en los síntomas psicóticos subclínicos como función de su historia reciente o acumulada de consumo habitual de marihuana y si dichos efectos permanecían después de la abstinencia. Los modelos controlaron todos los factores estables

en el tiempo (defecto) y varias covariables que variaban a lo largo del tiempo como posibles variables de confusión.

**Resultados:** Por cada año que los jóvenes consumieron marihuana de forma habitual, el nivel esperado de subsiguientes síntomas psicóticos subclínicos aumentó en un 21% y las posibilidades esperadas de que experimentaran subsiguiente paranoia subclínica o alucinaciones aumentó en un 133% y en un 92% respectivamente. El efecto del consumo habitual de marihuana sobre los síntomas psicóticos subclínicos subsiguientes persistió incluso cuando los adolescentes dejaron de consumir marihuana por un año. Dichos efectos se observaron después de controlar todas las variables estables en el tiempo y algunas variables de confusión que variaban con el tiempo. No se encontró evidencia de causalidad inversa.

**Conclusiones:** Estos resultados sugieren que el consumo habitual de marihuana puede aumentar de forma significativa el riesgo de que un adolescente experimente síntomas psicóticos subclínicos persistentes.

*(Am J Psychiatry 2016; 173:781–789)*

## Cannabis, psicosis y mortalidad: Un estudio de cohorte de 50.373 hombres suecos

Edison Manrique-García, M.D., Ph.D., Antonio Ponce de León, Ph.D., Christina Dalman, M.D., Ph.D., Sven Andréasson, M.D., Ph.D., Peter Allebeck, M.D., Ph.D.

**Objetivo:** Los autores evaluaron 1) el riesgo general de muerte entre consumidores de cannabis en comparación con no consumidores y hasta qué punto la psicosis afecta el exceso de mortalidad; 2) la mortalidad entre las personas con trastornos psicóticos y hasta qué punto el consumo de cannabis afecta el exceso de mortalidad; y 3) el efecto de la interacción del consumo de cannabis y el diagnóstico de trastornos psicóticos en la mortalidad.

**Método:** Este fue un estudio longitudinal de 50.373 reclutas militares (edades 18–19) a quienes se les hizo seguimiento hasta aproximadamente los 60 años en el Registro Nacional de Causas de Muerte. Se utilizó el modelo de los riesgos proporcionales de Cox para evaluar el riesgo de muerte en relación con el consumo de cannabis al inicio del estudio y el diagnóstico de trastornos psicóticos.

**Resultados:** Los sujetos que al inicio del estudio tenían un historial de un marcado consumo de cannabis tuvieron un riesgo de muerte significativamente mayor (cociente de riesgo=1,4; IC 95%=1,1–1,8) que los que no tenían dicho his-

torial. Los autores encontraron un exceso de mortalidad entre los sujetos con trastornos psicóticos, pero el nivel no fue diferente entre los que tenían un historial de consumo de cannabis (consumidores ocasionales: cociente de riesgo=3,8, IC 95%=2,8–5,0; consumidores fuertes: cociente de riesgo=3,8; IC 95%=2,6–6,2) y los que no presentaban dicho historial: (cociente de riesgo=3,7; IC 95%=3,1–44). No se observó ninguna interacción entre el consumo de cannabis y el diagnóstico de trastornos psicóticos con respecto a la mortalidad.

**Conclusiones:** Los resultados sugieren que los individuos con un historial temprano de consumo fuerte de cannabis tiene mayor riesgo de muerte que aquellos con en cuyo historial no aparece el consumo de cannabis. Aunque los autores ajustaron diversas variables de confusión al inicio del estudio, los resultados deben interpretarse con precaución debido a la falta de información sobre las variables de confusión en el período posterior al reclutamiento.

(*Am J Psychiatry* 2016; 173:790–798)

## Exposición prenatal a la nicotina y riesgo de esquizofrenia en niños de una cohorte nacional de nacimiento

Solja Niemelä, M.D., Ph.D., Andre Sourander, M.D., Ph.D., Heljä-Marja Surcel, Ph.D., Susanna Hinkka-Yli-Salomäki, Ph.Lic., Ian W. McKeague, Ph.D., Keely Cheslack-Postava, Ph.D., Alan S. Brown, M.D., M.P.H.

**Objetivo:** El consumo de cigarrillos durante el embarazo es un problema importante de salud pública que tiene resultados adversos para la salud de los hijos y les causa anomalías en el neurodesarrollo. Su prevalencia en los Estados Unidos es del 12%–25%. Este estudio examinó la relación entre la exposición prenatal a la nicotina (nivel de cotinina) en los sueros archivados de las madres y la esquizofrenia en los hijos de una cohorte nacional de nacimiento.

**Método:** Los autores realizaron un estudio de casos y controles anidado de todos los nacimientos vivos en Finlandia entre 1983 y 1998. Los casos de esquizofrenia en los hijos (N=977) se identificaron a partir de un registro nacional y se aparearon 1:1 con controles teniendo en cuenta la fecha de nacimiento, el sexo y la residencia. Los niveles de cotinina del suero materno se midieron prospectivamente utilizando inmunoensayos cuantitativos, a partir de especímenes de suero desde la fase temprana hasta la fase media de la gestación, archivados en un biobanco nacional.

**Resultados:** Un nivel de cotinina materna más alto, medido

como una variable continua, se asoció con mayores probabilidades de esquizofrenia (*odds ratio*=3,41; Intervalo de confianza 95%=1,86–6,24). La exposición materna fuerte a la nicotina definida categóricamente se relacionó con un aumento del 38% de la probabilidad de esquizofrenia. Estos hallazgos no fueron explicados por la edad de la madre, los trastornos psiquiátricos maternos o paternos, el estatus socio-económico ni por otras covariables. No hubo evidencia clara de que el peso por edad gestacional mediara las asociaciones.

**Conclusiones:** Este es el primer estudio, en conocimiento de los autores, de la relación entre un marcador del consumo de tabaco materno y la esquizofrenia. Ofrece la evidencia más concluyente hasta la fecha de que el consumo de tabaco durante el embarazo está asociado con la esquizofrenia. Si se replican, estos hallazgos sugieren que previniendo el consumo de tabaco durante el embarazo se puede reducir la incidencia de la esquizofrenia.

(*Am J Psychiatry* 2016; 173:799–806)

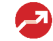

## El efecto del tratamiento concomitante con ISRS y estatinas: Un estudio basado en la población

Ole Köhler, M.D., Christiane Gasse, R.Pharm., Ph.D., Liselotte Petersen, M.Sc., Ph.D., Katja G. Ingstrup, M.Sc., Ph.D., Andrew A. Nierenberg, M.D., Ole Mors, M.D., Ph.D., Søren D. Østergaard, M.D., Ph.D.

**Objetivo:** Tanto los estudios preclínicos como los ensayos clínicos han indicado que la combinación de un inhibidor selectivo de la recaptación de serotonina (ISRS) y una estatina puede tener efectos antidepresivos superiores en comparación con el tratamiento únicamente con ISRS. Los autores se propusieron evaluar si dicho efecto beneficioso se puede generalizar a una población más heterogénea de consumidores de ISRS.

**Método:** En un estudio de cohorte de alcance nacional que incluyó todos los consumidores nuevos de ISRS en Dinamarca entre 1997 y 2012, los autores compararon personas que tuvieron periodos de consumo concomitante de ISRS y estatinas con personas que tuvieron periodos de tratamiento únicamente con ISRS. Los resultados incluyeron las tasas de contactos con un hospital psiquiátrico (por cualquier causa), y contactos con un hospital psiquiátrico por motivo de depresión, comportamiento suicida y mortalidad por todas las causas. Utilizando la regresión de Cox y el análisis de riesgos competitivos, los autores calcularon y ajustaron los cocientes de riesgo (*hazard ratios*) para estos resultados.

**Resultados:** Los autores identificaron 872.216 consumidores nuevos de ISRS, de los cuales 113.108 (13,0%) tomaban una estatina concomitantemente. En comparación con el tratamiento únicamente con ISRS, el uso combinado de un ISRS y una estatina se asoció con un riesgo significativamente inferior tanto de contactar a un hospital psiquiátrico (cociente de riesgo ajustado=0,75; IC 95%=0,69–0,82) como de contactar a un hospital psiquiátrico por motivo de depresión (cociente de riesgo ajustado=0,64; IC 95%=0,55–0,75) En comparación con el tratamiento únicamente con ISRS, el uso concomitante de ISRS y estatinas no se asoció con aumentos significativos en mortalidad por todas las causas (cociente de riesgo ajustado=1,04; IC 95%=0,96–1,12) ni con comportamiento suicida (cociente de riesgo ajustado=0,85; IC 95%=0,61–1,18).

**Conclusiones:** En una cohorte naturalista grande, el tratamiento concomitante con ISRS y estatinas resultó en ventajas considerables en comparación con el tratamiento únicamente con ISRS.

(*Am J Psychiatry* 2016; 173:807–815)

## Un estudio de frecuencia de dosis, controlado con placebo, aleatorizado y doble ciego de la ketamina intravenosa en pacientes con depresión resistente al tratamiento

Jaskaran B. Singh, M.D., Maggie Fedgchin, Pharm.D., Ella J. Daly, M.D., Peter De Boer, Ph.D., Kimberly Cooper, M.S., Pilar Lim, Ph.D., Christine Pinter, M.S., James W. Murrough, M.D., Gerard Sanacora, M.D., Richard C. Shelton, M.D., Benji Kurian, M.D., Andrew Winokur, M.D., Maurizio Fava, M.D., Husseini Manji, M.D., Wayne C. Drevets, M.D., Luc Van Nueten, M.D.

**Objetivo:** La ketamina, un antagonista del receptor de glutamato N-metil-D-aspartato, ha demostrado un efecto antidepressivo de inicio rápido en pacientes con depresión resistente al tratamiento. Este estudio evaluó la eficacia de la administración intravenosa de ketamina dos y tres veces por semana para mantener los efectos antidepressivos iniciales en pacientes con depresión resistente al tratamiento.

**Método:** En un estudio doble ciego y multicéntrico, se asignó de forma aleatoria a adultos (de edades entre 18 y 64 años) con depresión resistente al tratamiento para recibir o bien ketamina intravenosa (0,5 mg/kg del peso corporal), o placebo intravenoso, administrado en un periodo de 40 minutos, dos o tres veces por semana, hasta por 4 semanas. Los pacientes que discontinuaron el tratamiento doble ciego después de por lo menos 2 semanas por falta de eficacia podían entrar en una fase abierta opcional de 2 semanas para recibir ketamina con la misma frecuencia que en la fase doble-cega. La medida de resultados primarios fue el cambio desde el inicio del estudio hasta el día 15 en la puntuación total en la Escala de Montgomery-Åsberg para la Evaluación de la Depresión (MADRS).

**Resultados:** En total, 67 (45 mujeres) de 68 pacientes aleatorizados recibieron tratamiento. En los grupos que recibieron una dosis dos veces por semana, el cambio medio en la puntuación MADRS en el día 15 fue  $-18,4$  (DE=12,0) para la ketamina y  $-5,7$  (DE=10,2) para el placebo; en los grupos que recibieron el tratamiento tres veces por semana, el cambio medio fue  $-17,7$  (DE=7,3) para la ketamina y  $-3,1$  (SD=5,7) para el placebo. Se observaron comportamientos similares para la ketamina durante la fase abierta (dos veces por semana,  $-12,2$  [DE=12,8] en el día 4; tres veces por semana,  $-14,0$  [DE=12,5] en el día 5). Ambos regímenes fueron bien tolerados en general. Los efectos adversos más comunes ( $\geq 20\%$ ) derivados del tratamiento fueron dolor de cabeza, ansiedad, disociación, náuseas y mareo. Los síntomas disociativos ocurrieron de manera transitoria y se atenuaron con la repetición de las dosis.

**Conclusiones:** La administración de ketamina dos veces por semana y tres veces por semana en dosis de 0,5 mg/kg mantuvo una eficacia antidepressiva de forma similar en el transcurso de 15 días.

(*Am J Psychiatry* 2016; 173:816–826)



# Un ensayo aleatorizado para evaluar la eficacia y seguridad de ABT-126, un agonista del receptor selectivo $\alpha 7$ nicotínico de acetilcolina, en el tratamiento del déficit cognitivo en esquizofrenia

George M. Haig, Pharm.D. M.B.A., Earle E. Bain, M.D., Weining Z. Robieson, Ph.D., Jeffrey D. Baker, Ph.D., Ahmed A. Othman, Ph.D.

**Objetivo:** El objetivo de los autores fue evaluar la eficacia y la seguridad del ABT-126, un agonista parcial del receptor selectivo  $\alpha 7$  nicotínico, en pacientes estables con esquizofrenia.

**Método:** Se realizó un estudio de fase 2, de grupos paralelos, controlado con placebo y doble ciego por 12 semanas en los Estados Unidos. Se asignó de forma aleatoria a pacientes con esquizofrenia clínicamente estables para recibir una dosis diaria de 10mg de ABT-126, 25mg de ABT-126, o placebo. La medida de eficacia primaria fue el cambio desde el inicio del estudio hasta la semana 12 en la puntuación compuesta obtenida en la Batería Cognitiva de Consenso MATRICS (MCCB, por sus siglas en inglés), evaluada por una prueba t unilateral. Las medidas secundarias incluyeron las puntuaciones de los dominios de la batería MCCB y la puntuación total obtenida en la Evaluación de Habilidades basadas en el Desempeño UCSD, cada una evaluada por pruebas t bilaterales.

**Resultados:** Un total de 207 sujetos fueron asignados de manera aleatoria a los diferentes grupos de estudio, y 165 (81%) de los sujetos completaron el estudio. El ABT-126 mostró una mejoría que no alcanzó a ser significativa en la puntuación compuesta en la batería MCCB en la semana 12 (la diferencia

media de mínimos cuadrados con respecto al placebo fue 1,3 y 1,5 para los grupos de 10 mg y 25 mg respectivamente). Se observó una interacción significativa entre tratamiento y estatus de fumador en el cambio medio entre el inicio del estudio y la puntuación compuesta final de la batería MCCB: los no fumadores (N=69) demostraron una diferencia con el placebo de 2,9 (EE=1,4) en el grupo de 10 mg y 5,2 (EE=1,6) en el grupo de 25mg, mientras que en los fumadores (N=113) no se observó ninguna diferencia. Entre los no fumadores en el grupo de 25 mg de ABT-126 (N=19), se dieron mejorías significativas en comparación con el placebo, en la evaluación final del aprendizaje verbal (diferencia media de mínimos cuadrados=5,5; EE=1,9), la memoria de trabajo (diferencia media de mínimos cuadrados=5,4; EE=2,0), y la atención/vigilancia (diferencia media de mínimos cuadrados=8,7; EE=2,5). Los eventos adversos más frecuentes para ABT-126 fueron mareo, diarrea y fatiga (todos con incidencia <8%).

**Conclusiones:** El ABT-126 demostró un efecto procognitivo en sujetos no fumadores, particularmente en el aprendizaje verbal, la memoria de trabajo y la atención.

(*Am J Psychiatry* 2016; 173:827–835)
