# The American Journal of Psychiatry

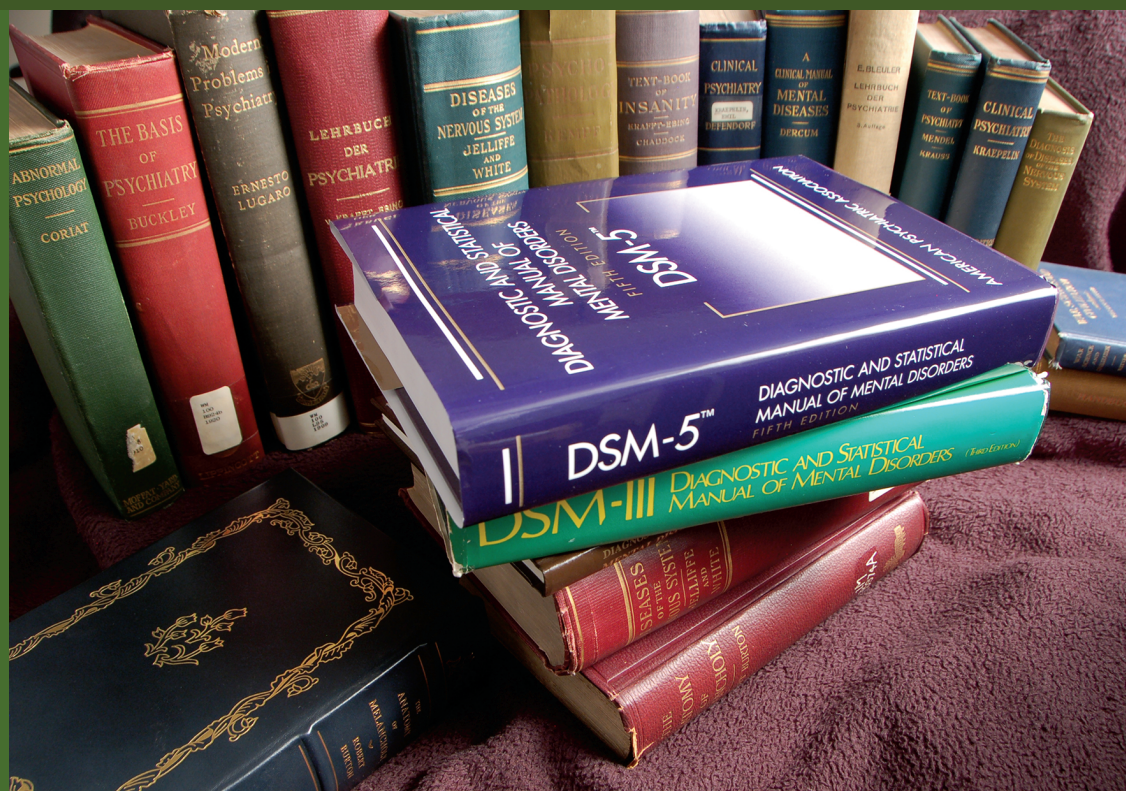

The Phenomenology of Major Depression and the Representativeness and Nature of DSM Criteria

Concurrent and Sustained Cumulative Effects of Adolescent Marijuana Use on Subclinical Psychotic Symptoms

Prenatal Nicotine Exposure and Risk of Schizophrenia Among Offspring in a National Birth Cohort

A Double-Blind, Randomized, Placebo-Controlled, Dose-Frequency Study of Intravenous Ketamine in Patients With Treatment-Resistant Depression

AMERICAN  
PSYCHIATRIC  
ASSOCIATION

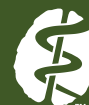

[ajp.psychiatryonline.org](http://ajp.psychiatryonline.org)
