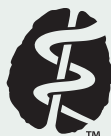

# The American Journal of Psychiatry

Official Journal of the American Psychiatric Association

## Officers 2016–2017

### President

Maria A. Oquendo, M.D.

### President-Elect

Anita S. Everett, M.D.

### Treasurer

Bruce J. Schwartz, M.D.

### Secretary

Altha J. Stewart, M.D.

### Assembly

#### Speaker

Daniel J. Anzia, M.D.

#### Speaker-Elect

Theresa M. Miskimen, M.D.

#### Recorder

James R. Batterson, M.D.

### Office of the CEO and Medical Director

#### CEO and Medical Director

Saul Levin, M.D., M.P.A.

### Board of Trustees

Uchenna Achebe, M.D., M.P.H.

Jeffrey Akaka, M.D.

Lama Bazzi, M.D.

R. Scott Benson, M.D.

Renée L. Binder, M.D.

Ronald M. Burd, M.D.

Stella Cai, M.D.

Jeffrey L. Geller, M.D., M.P.H.

Jeffrey A. Lieberman, M.D.

Roger Peele, M.D.

Vivian B. Pender, M.D.

Gail E. Robinson, M.D.

Paul Summergrad, M.D.

Richard F. Summers, M.D.

Melinda Young, M.D.

## Editorial Board

### Editor

Robert Freedman, M.D.

### Deputy Editors

David A. Lewis, M.D.

Robert Michels, M.D.

Daniel S. Pine, M.D.

A. John Rush, M.D.

Susan K. Schultz, M.D.

Carol A. Tamminga, M.D.

### Associate Editors

Alan Brown, M.D., M.P.H.

Tyrone Cannon, Ph.D.

Benjamin G. Druss, M.D., M.P.H.

Felton Earls, M.D.

Graham J. Emslie, M.D.

Daniel C. Javitt, M.D.

Bankole Johnson, M.D.

Joan L. Luby, M.D.

Constantine G. Lyketsos, M.D., M.H.S.

Helen S. Mayberg, M.D., F.R.C.P.C.

Terrie E. Moffitt, Ph.D.

Roy Perlis, M.D.

Anita Thapar, M.B.B.Ch., F.R.C.Psych.,

Ph.D., F.Med.Sci.

Mauricio Tohen, M.D., Dr.PH., M.B.A.

Eduard Vieta, M.D., Ph.D.

Katherine L. Wisner, M.D., M.S.

Xin Yu, M.D.

### Editor Emerita

Nancy C. Andreasen, M.D., Ph.D.

### Former Editors

Amariah Brigham, M.D., 1844–1849

T. Romeyn Beck, M.D., 1849–1854

John P. Gray, M.D., 1854–1886

G. Alder Blumer, M.D., 1886–1894

Richard Dewey, M.D., 1894–1897

Henry M. Hurd, M.D., 1897–1904

Edward N. Brush, M.D., 1904–1931

Clarence B. Farrar, M.D., 1931–1965

Francis J. Braceland, M.D., 1965–1978

John C. Nemiah, M.D., 1978–1993

### Editorial Staff

#### Executive Editor

Michael D. Roy

#### Senior Editors

John J. Guardiano, Ph.D.

Jane Weaver

#### Production Manager

Susan Westrate

#### Assistant Editor

Angela Moore

#### Online Content Manager

Michael Pogachar

#### Editorial Support Services Manager

Heidi Koch

#### Editorial Assistant

Linda LaCour

#### Assistants to the Editors

Lois Lilienthal

Laura English

Rachel Hogg

Russell A. Scholl

### Publisher

Rebecca D. Rinehart

# The Residents' JOURNAL

## The American Journal of Psychiatry Residents' Journal

July 2016

Volume 11

Issue 7

### Inside

- 2 **The Residents' Journal: A 10-Year Journey and Symbol of Collaboration**  
Katherine S. Pier, M.D.
- 3 **Clozapine Clinic: The Need of the Hour**  
Andrew Hughes, M.D., Batwinder Singh, M.D., M.S.  
*Commentary on reasons for the low prescription rate, with discussion on how clinics could improve schizophrenia treatment.*
- 4 **The Modern Psyche: Wisdom, Pursuit, and Contentment**  
Aparna Atturu, M.D.  
*Generational perspectives on self-discovery.*
- 5 **Mental Health in LGBT Refugee Populations**  
Mark Messih, M.D., M.Sc.  
*Examining the effects of traumatic, resettlement, acculturation, and isolation stress on LGBT refugees.*
- 8 **Psychiatric Implications of Mitochondrial Disorders**  
Gabriella Inczedy Farkas, M.D., Ph.D.  
*Analysis of pathophysiology, diagnosis, psychiatric involvement, treatment, and prevention.*
- 11 **Religious Barriers to Mental Healthcare**  
Emine Rabia Ayyaci, M.D.  
*Assessing the impact of patient-, psychiatrist-, and system-level barriers posed by religious values.*
- 14 **Fire Setting and the Impulse-Control Disorder of Pyromania**  
R. Scott Johnson, M.D., J.D., LL.M., Elisabeth Netherton, M.D.  
*Analysis of epidemiology, prevalence, nosology, duty to warn, and treatment.*
- 17 **Conversion Disorder With Conceptual and Treatment Challenges**  
Furqan Nusair, M.B.B.S., Nathan Franck, B.A., Rafael Klein-Cloud, A.B.  
*Discussion of implications, revision of DSM-5 criteria, mechanisms of conversion, cultural factors, and ongoing challenges.*
- 20 **Residents' Resources**
- 21 **Author Information for The Residents' Journal Submissions**

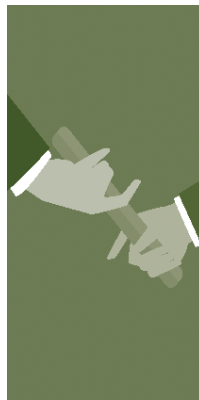

#### EDITOR-IN-CHIEF

Katherine Pier, M.D.

#### SENIOR DEPUTY EDITOR

Rachel Katz, M.D.

#### DEPUTY EDITOR

Oliver Glass, M.D.

#### ASSOCIATE EDITORS

Gopalkumar Rakesh, M.D.

Janet Charoensook, M.D.

#### MEDIA EDITOR

Michelle Liu, M.D.

#### CULTURE EDITOR

Aparna Atturu, M.D.

#### STAFF EDITOR

Angela Moore

#### EDITORS EMERITI

Rajiv Radhakrishnan, M.B.B.S., M.D.

Misty Richards, M.D., M.S.

Arshya Vahabzadeh, M.D.

Monifa Seawell, M.D.

Sarah M. Fayad, M.D.

Joseph M. Cerimele, M.D.

Molly McVoy, M.D.

Sarah B. Johnson, M.D.

#### Editor-in-Chief

Katherine Pier, M.D.

#### Senior Deputy Editor

Rachel Katz, M.D.

#### Deputy Editor

Oliver Glass, M.D.

#### Associate Editors

Gopalkumar Rakesh, M.D.

Janet Charoensook, M.D.

*The Residents' Journal*, the largest and most robust resident-led journal in the house of medicine, is an e-publication that serves as a forum to share your ideas and experiences in training, clinical practice, research, and careers with your colleagues.

To submit a manuscript, please visit [mc.manuscriptcentral.com/appi-ajp](http://mc.manuscriptcentral.com/appi-ajp) and select a manuscript type for AJP Residents' Journal. You may submit a commentary (500 words), book review (500 words), history of psychiatry (500 words), clinical case conference (1,250 words), review article (1,500 words), treatment in psychiatry article (1,500 words), research article (1,250 words), drug review (1,500 words), or letter to the editor (250 words).

*The Residents' Journal* is sent free-of-charge to all psychiatry residents. Anyone interested in being included on the distribution list should contact Angela Moore, *The Residents' Journal* staff editor at [ajp@psych.org](mailto:ajp@psych.org) with "Subscribe to Residents' Journal" in the subject line.

To access the complete Residents' Journal archives, visit [ajp.psychiatryonline.org/residents\\_journal](http://ajp.psychiatryonline.org/residents_journal)

# THE AMERICAN PSYCHIATRIC ASSOCIATION

1000 Wilson Blvd., Suite 1825, Arlington, VA 22209-3901  
(888) 357-7924 (toll-free inside the U.S. and Canada) / (703) 907-7300  
web site: [www.psychiatry.org](http://www.psychiatry.org) • e-mail: [apa@psych.org](mailto:apa@psych.org)

## Chairpersons of Councils, Committees, and Task Forces

### Standing Committees

|                             |                          |
|-----------------------------|--------------------------|
| <b>Bylaws</b>               | Edythe Harvey, M.D.      |
| <b>Elections</b>            | Barry K. Herman, M.D.    |
| <b>Ethics</b>               | Ezra Griffith, M.D.      |
| <b>Finance and Budget</b>   | Alan F. Schatzberg, M.D. |
| <i>Audit</i>                | Bruce J. Schwartz, M.D.  |
| <i>Investment Oversight</i> | David Fassler, M.D.      |
| <b>Joint Reference</b>      | Anita S. Everett, M.D.   |
| <b>Membership</b>           | Rahn K. Bailey, M.D.     |
| <b>Nominating</b>           | Renee Binder, M.D.       |
| <b>Tellers</b>              | Jose Vito, M.D.          |

### Councils

#### **Council on Addiction Psychiatry**

Frances R. Levin, M.D.

#### **Council on Advocacy and Government Relations**

Debra Pinals, M.D.

*Advocacy and Litigation Funding*

Jeffrey Akaka, M.D.

#### **Council on Children, Adolescents, and Their Families**

Joseph V. Penn, M.D.

#### **Council on Communications**

Christopher Ramsey, M.D.

#### **Council on Geriatric Psychiatry**

Robert P. Roca, M.D.

#### **Council on Healthcare Systems and Financing**

Harsh K. Trivedi, M.D.

*Reimbursement for Psychiatric Care*

Laurence Miller, M.D.

*RBRVS, Codes and Reimbursement*

Gregory G. Harris, M.D.

*Telepsychiatry*

James H. Shore, M.D.

#### **Council on International Psychiatry**

Bernardo Ng, M.D.

#### **Council on Medical Education and Lifelong Learning**

Mark H. Rapaport, M.D.

*Scientific Program*

Philip Muskin, M.D.

*Vestermark Award Committee*

Jonathan F. Borus, M.D.

#### **Council on Minority Mental Health and Health Disparities**

Christina V. Mangurian, M.D.

#### **Council on Psychiatry and Law**

Steven K. Hoge, M.D.

*Judicial Action*

Marvin S. Swartz, M.D.

#### **Council on Psychosomatic Medicine (Consultation Liaison Psychiatry)**

David F. Gitlin, M.D.

#### **Council on Quality Care**

Grayson Norquist, M.D.

*Mental Health Information Technology*

Steven Daviss, M.D.

*Performance Measures*

Karen Pierce, M.D.

*Steering Committee on Practice Guidelines*

Michael J. Vergare, M.D.

#### **Council on Research**

Dwight L. Evans, M.D.

*Psychiatric Dimensions of Disasters*

Robert J. Ursano, M.D.

# Go Online

Visit [ajp.psychiatryonline.org](http://ajp.psychiatryonline.org) for these features!

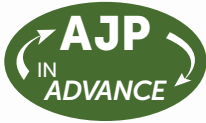

## AJP in Advance

*Discover the latest research advances before they appear in print*

### **Association of Resting Metabolism in the Fear Neural Network With Extinction Recall Activations and Clinical Measures in Trauma-Exposed Individuals**

Higher resting metabolism in the dorsal anterior cingulate cortex of individuals with PTSD is associated with more severe symptoms and with the dysregulated neural activation pattern characteristic of PTSD during extinction recall. Low resting metabolism in the amygdala and hippocampus of a trauma-exposed group without PTSD suggests the possibility of a resilience factor.

### **Pharmacotherapy Relapse Prevention in Body Dysmorphic Disorder: A Double-Blind, Placebo-Controlled Trial**

Continuing escitalopram for 6 months after response to acute-phase treatment for body dysmorphic disorder reduced the likelihood of relapse and delayed its occurrence. Also, about a third of patients who received continued escitalopram had further improvement of body dysmorphic disorder severity.

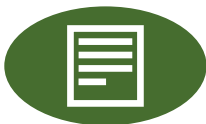

## AJP CME

*Earn CME credit: 3 courses per issue*

This month's courses appear on pages 853–856. Each short course is based on one article in this issue and can earn up to 1 *AMA PRA Category 1 Credit™*. CME credit is issued only **online**, and a paid subscription to AJP's CME course program is required.

Visit [psychiatryonline.org/cme](http://psychiatryonline.org/cme) and click on the "American Journal of Psychiatry" tab.

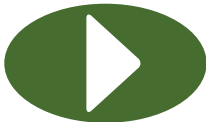

## AJP Multimedia

*Access Audio or Video for highlights of each issue*

In AJP Audio this month, Deputy Editor Susan K. Schultz, M.D., discusses accelerometers in diagnosis and treatment of late-life depression, concomitant use of SSRIs and statins, treatment of cognitive impairment in schizophrenia with an alpha-7 nicotinic receptor agonist, the relation of adolescent marijuana use to subclinical psychotic symptoms and to mortality at age 60, and the effect of nicotine exposure during pregnancy to development of schizophrenia in offspring.

In this month's video, Deputy Editor Daniel S. Pine, M.D., discusses the effects of combining SSRI treatment with a statin and the effectiveness and safety of ketamine in treating depression.

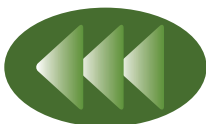

## History of Psychiatry

*Revisit the field's rich history through the pages of AJP*

### **50 years ago this month: "The Use of Lithium Carbonate in the Treatment of Manic Psychoses"**

Drs. Schlegenhaut, Tupin, and White report on the successful use of lithium in a series of 10 patients with acute, severe mania: "All patients had a favorable response to lithium therapy," usually within 4 or 5 days. Lithium had been rediscovered as an effective treatment for mania nearly two decades earlier, by Dr. John F.J. Cade in Australia, but it was slow to catch on, in part because of its toxicity. Lithium was approved by the FDA for the treatment of mania in 1970.
